# Supplementary material
Source: PubMed Central journal article supplement (PMC2650375)
Supplement: 0900008106_0900008106SI.pdf [file 0900008106_0900008106SI.pdf]

# Supporting Information

Wieland Brown *et al.* 10.1073/pnas.090008106

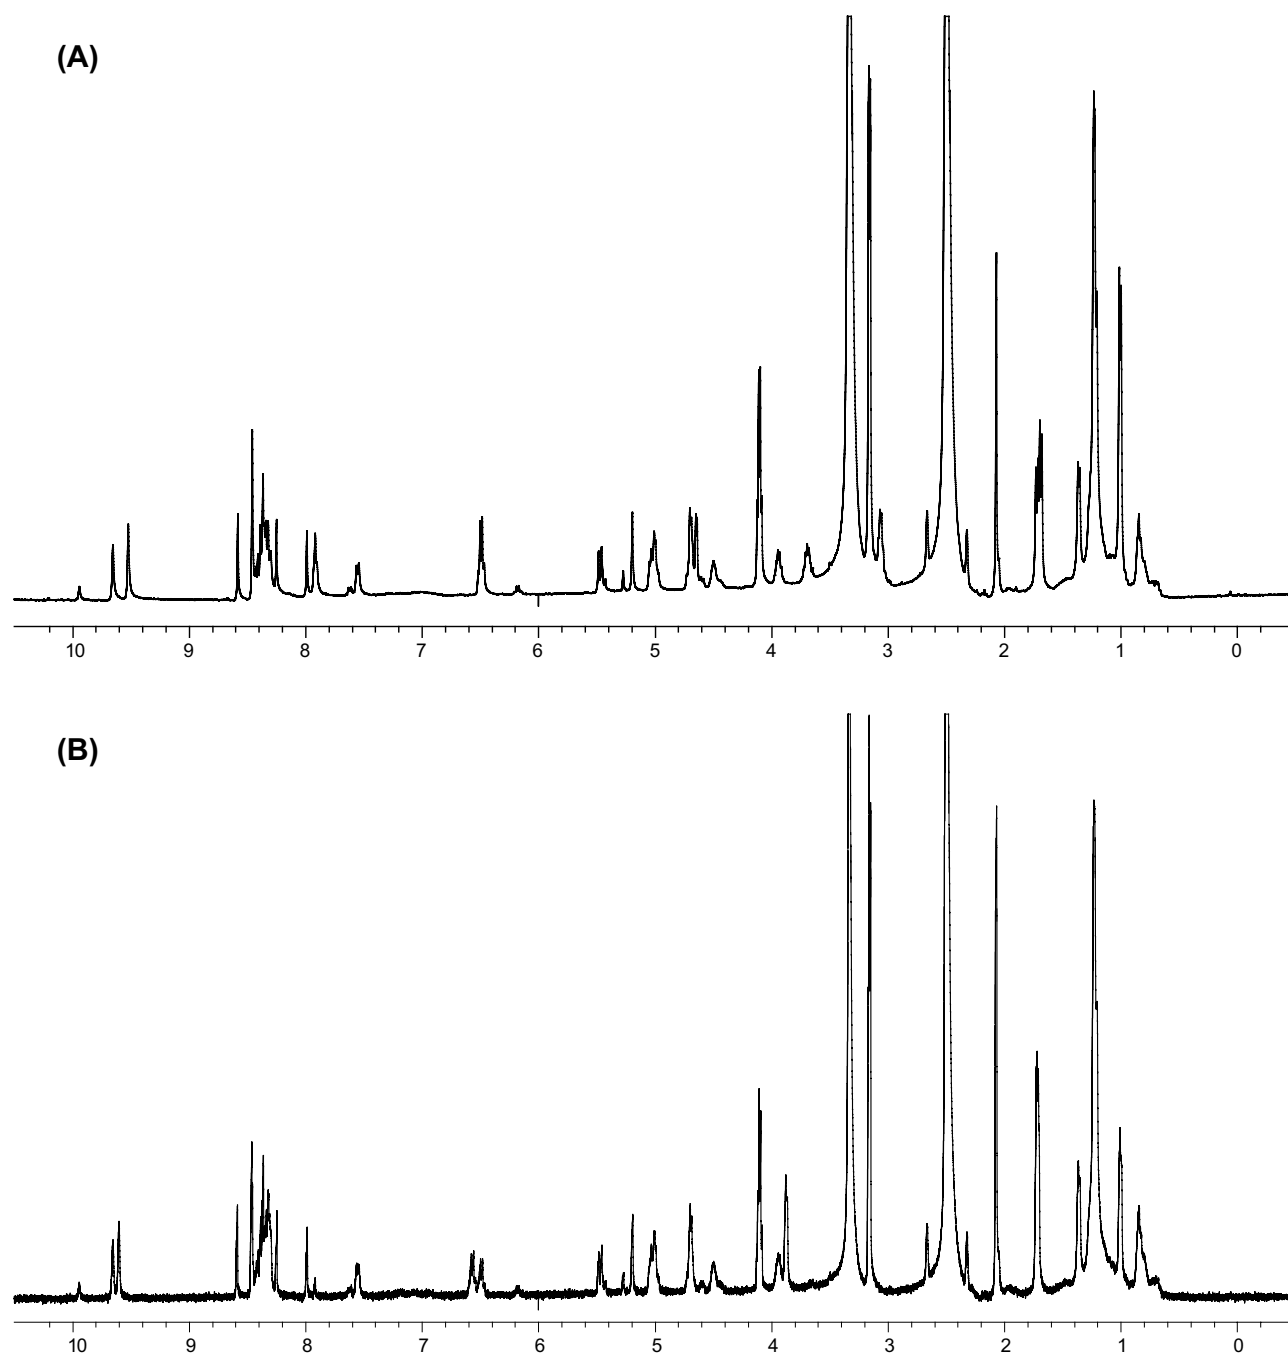

**Fig. S1.** Characterization of thiocillins by NMR.  $^1\text{H}$ -NMR spectra of thiocillin I (compound **3**) (A) and YM-266183 [compound **6**, also known as QN3323A (**1**)] (B) are shown. Compounds were dissolved in  $\text{DMSO-}d_6$ , and data were collected on a Varian 400-MHz NMR spectrometer. Spectrum A contains minor peaks that are consistent with the presence of QN3323Y1 (**1**), which differs from **3** only in the olefin geometry at Dhb4, as a minor product.

1. Kamigiri K, *et al.* (2006) US Patent 7030085 (April 18, 2006).

**Table S1. Primers used in this study**

| Primer | Sequence                                              | Comments        |
|--------|-------------------------------------------------------|-----------------|
| LCW001 | 5'-gtac <u>ggatcc</u> catactcccagattattgcagtcgtaac-3' | BamHI (LF-5')   |
| LCW002 | 5'-gtac <u>gtcgacg</u> agagagagatacatatgcttactg-3'    | Sall (LF-3')    |
| LCW010 | 5'-gtac <u>ggatcc</u> gaaataaactctatttcagaaattgag-3'  | BamHI (cam1-5') |
| LCW011 | 5'-gtac <u>ctcgagg</u> tccgattgttcggacacacctaagc-3'   | XhoI (cam1-3')  |
| LCW012 | 5'-gtac <u>ggatcc</u> ccaactccctcagttcatttacagg-3'    | BamHI (cam2-5') |
| LCW013 | 5'-gtac <u>ctcgagc</u> tactcttcaataaatcagggacttg-3'   | XhoI (cam2-3')  |
| LCW014 | 5'-gtac <u>ggatcc</u> ggacgattatgaaagtcccttcgcag-3'   | BamHI (cam3-5') |
| LCW015 | 5'-gtac <u>ctcgagc</u> catcgctccgtacaagtgaataattc-3'  | XhoI (cam3-3')  |
| LCW028 | 5'-gctgaattcataagcttatactagtgtc-3'                    | IMX_check1.3'   |
| LCW029 | 5'-gtgtagcatgtctcattcaattttgagg-3'                    | IMX_check2.5'   |
| LCW032 | 5'-gtgatataacatgaaaccaataaactatg-3'                   | IM2_check1.5'   |
| LCW033 | 5'-ctacaaggtgtgagaccgattttcaac-3'                     | IM2_check2.3'   |
| LCW034 | 5'-catgaataactataccgttatgaaatcc-3'                    | IM3_check1.5'   |
| LCW035 | 5'-cacctacaagaaattttgaaactaac-3'                      | IM3_check2.3'   |
| LCW040 | 5'-gttagaagactatgatgtaccgtggatc-3'                    | IM4_check1.5'   |
| LCW041 | 5'-ccgcggttgatcgactacgatgatc-3'                       | IM4_check2.3'   |
| LCW042 | 5'-caaagcacgctacatctgatgagagaaac-3'                   | IM1_check1a.5'  |
| LCW043 | 5'-gtgcttacctaatcctggcctatctta-3'                     | IM1_check2a.3'  |

Restriction sites are underlined.

**Table S2. Plasmids used in this study**

| Plasmid | Comments                                                                                          | Source                               |
|---------|---------------------------------------------------------------------------------------------------|--------------------------------------|
| pKM082  | Carries MLS resistance gene.                                                                      | David Rudner, Harvard Medical School |
| pLW106  | Derived from pKM082. Transformed into <i>B. cereus</i> ATCC14579 to generate IM1. (pKM082 + cam2) | This study                           |
| pLW105  | Derived from pKM082. Transformed into <i>B. cereus</i> ATCC14579 to generate IM2. (pKM082 + cam1) | This study                           |
| pLW111  | Derived from pKM082. Transformed into <i>B. cereus</i> ATCC14579 to generate IM3. (pKM082 + LF)   | This study                           |
| pLW107  | Derived from pKM082. Transformed into <i>B. cereus</i> ATCC14579 to generate IM4. (pKM082 + cam3) | This study                           |

**Table S3. Strains used in this study**

| Strain                          | Comments                                                                    | Source     |
|---------------------------------|-----------------------------------------------------------------------------|------------|
| <i>B. cereus</i> ATCC 14579     | Thiocillin producer                                                         | ATCC       |
| <i>B. cereus</i> ATCC 14579 IM1 | Derivative of <i>B. cereus</i> ATCC 14579 harboring pLW106 (MLS resistance) | This study |
| <i>B. cereus</i> ATCC 14579 IM2 | Derivative of <i>B. cereus</i> ATCC 14579 harboring pLW105 (MLS resistance) | This study |
| <i>B. cereus</i> ATCC 14579 IM3 | Derivative of <i>B. cereus</i> ATCC 14579 harboring pLW111 (MLS resistance) | This study |
| <i>B. cereus</i> ATCC 14579 IM4 | Derivative of <i>B. cereus</i> ATCC 14579 harboring pLW107 (MLS resistance) | This study |

Table S4. 400-MHz  $^1\text{H}$  NMR data of 3 in  $d_6$ -DMSO at 25 °C

| $\delta$ , ppm | Description | Integration | J, Hz |
|----------------|-------------|-------------|-------|
| 9.65           | s           | 1           |       |
| 9.52           | s           | 1           |       |
| 8.58           | s           | 1           |       |
| 8.46–8.30      | m           | 7           |       |
| 8.25           | s           | 1           |       |
| 7.99           | s           | 1           |       |
| 7.92–7.90      | m           | 1           |       |
| 7.55           | d           | 1           | 7.8   |
| 6.52–6.47      | m           | 2           |       |
| 5.48           | d           | 1           | 10.2  |
| 5.19           | s           | 1           |       |
| 5.05–4.97      | m           | 2           |       |
| 4.72–4.58      | m           | 3           |       |
| 4.50–4.48      | m           | 1           |       |
| 3.98–3.90      | m           | 1           |       |
| 3.75–3.65      | m           | 1           |       |
| 3.07–3.03      | m           | 2           |       |
| 2.07           | s           | 3           |       |
| 1.73–1.71      | m           | 6           |       |
| 1.37           | m           | 3           |       |
| 1.24–1.20      | m           | 6           |       |
| 1.01           | d           | 3           | 6.0   |

s, singlet; d, doublet; t, triplet; q, quartet; br, broad; m, multiplet.

Table S5. 400-MHz  $^1\text{H}$  NMR data of 6 in  $d_6$ -DMSO at 25 °C

| $\delta$ , ppm | Description | Integration | J, Hz |
|----------------|-------------|-------------|-------|
| 9.65           | s           | 1           |       |
| 9.60           | s           | 1           |       |
| 8.58           | s           | 1           |       |
| 8.46–8.32      | m           | 8           |       |
| 8.25           | s           | 1           |       |
| 7.99           | s           | 1           |       |
| 7.55           | d           | 1           | 8.0   |
| 6.58–6.55      | m           | 1           |       |
| 6.50–6.47      | m           | 1           |       |
| 5.48–5.44      | m           | 1           |       |
| 5.19           | s           | 1           |       |
| 5.04–4.98      | m           | 2           |       |
| 4.70–4.67      | m           | 2           |       |
| 4.51–4.98      | m           | 1           |       |
| 3.96–3.91      | m           | 1           |       |
| 3.88–3.86      | m           | 2           |       |
| 2.07           | s           | 3           |       |
| 1.73–1.71      | m           | 6           |       |
| 1.37           | m           | 3           |       |
| 1.24–1.20      | m           | 6           |       |
| 1.01           | d           | 3           | 6.0   |

s, singlet; d, doublet; t, triplet; q, quartet; br, broad; m, multiplet.
